# Supplementary material
Source: PubMed Central journal article supplement (PMC3967241)
Supplement: NIHMS544686-supplement-Supp_Fig_S1.pdf [file NIHMS544686-supplement-Supp_Fig_S1.pdf]

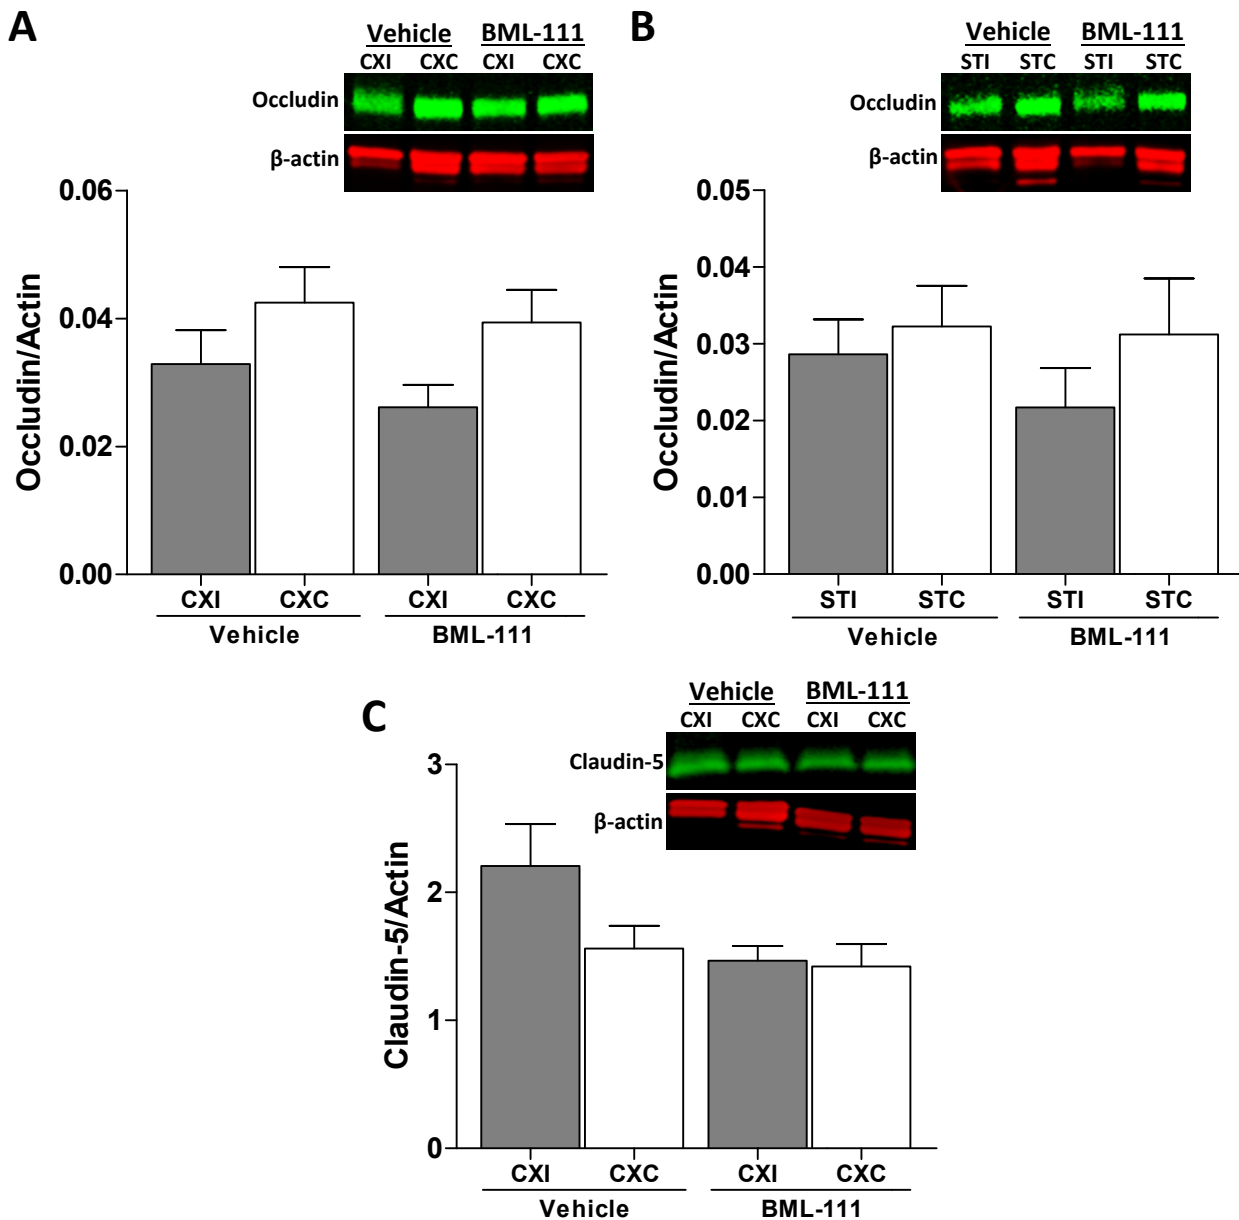

*Supplementary Figure 1. Occludin and claudin-5 are not affected by BML-111 treatment. A- B) No significant changes in occludin were observed following treatment with BML-111. No differences were seen between ipsilateral and contralateral hemispheres. Example immunoblot with occludin bands at 65 kDa. One-way ANOVA with Bonferroni posttests, n = 12 – 15. C) No changes were observed in claudin-5 levels between treatments or between ipsilateral contralateral hemispheres of the cerebral cortex. Example immunoblot is shown with bands at 22 kDa. One-way ANOVA with Bonferroni posttests, n = 12-15. CXI/CXC = cerebral cortex ipsilateral/contralateral. STI/STC = striatum ipsilateral/contralateral.*
